# Supplementary material for: Revised Adult Immunization Guideline Recommended by the Korean Society of Infectious Diseases, 2014
Source: PubMed Central journal article supplement — Infect Chemother. 2015 Mar 30;47(1):68–79. doi: 10.3947/ic.2015.47.1.68 (PMC4384453; doi:10.3947/ic.2015.47.1.68), 2015-03-30
Supplement: ic-47-68-s001.pdf [file ic-47-68-s001.pdf]

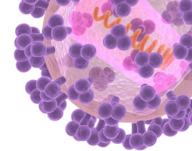

## 2014년 대한감염학회 권장 성인예방접종 개정안

최원석<sup>1</sup>, 최정현<sup>2</sup>, 권기태<sup>3</sup>, 서경<sup>4</sup>, 김민아<sup>4</sup>, 이상오<sup>5</sup>, 홍영진<sup>6</sup>, 이진수<sup>7</sup>, 송준영<sup>1</sup>, 방지환<sup>8</sup>, 최희정<sup>9</sup>, 최영화<sup>10</sup>, 이동건<sup>2</sup>, 정희진<sup>1</sup>; 대한감염학회 성인예방접종위원회

<sup>1</sup>고려대학교 의과대학 내과학교실, <sup>2</sup>가톨릭대학교 의과대학 내과학교실, <sup>3</sup>대구 파티마병원, <sup>4</sup>연세대학교 의과대학 산부인과학교실, <sup>5</sup>울산대학교 의과대학 내과학교실, <sup>6</sup>인하대학교 의과대학 소아과학교실, <sup>7</sup>내과학교실, <sup>8</sup>서울대학교 의과대학 내과학교실, <sup>9</sup>이화여자대학교 의과대학 내과학교실, <sup>10</sup>아주대학교 의과대학 내과학교실

대한감염학회는 2007년 10월 '성인예방접종(군자출판사, 서울)' 초판을 출판하였고 5년 뒤인 2012년 5월 '성인예방접종 2판(도서출판 MIP, 서울)'을 출판하였다. 그러나 성인예방접종과 관련된 새로운 내용들이 빠르게 다양하게 등장함에 따라 대한감염학회는 성인예방접종 교과서의 개정판 발간에 앞서 2년마다 소규모 개정을하기로 결정하였으며, 이러한 지침의 개발 및 개정, 성인예방접종 관련 연구 수행을 할 수 있도록 2012년 8월 대한감염학회 산하 성인예방접종위원회를 구성하였다.

본 개정안은 성인예방접종위원회 활동의 일환으로, 2012년 '성인예방접종 2판' 출간 이후 성인예방접종과 관련하여 등장한 각 백신별 이슈에 대해 최신의 역학 및 연구 동향을 반영하여 기존 지침을 일부 개정한 것이다. 본 개정안에서는 폐렴사슬알균 백신, 파상풍-디프테리아-백일해 백신, 대상포진 백신, 인유두종바이러스 백신, 인플루엔자 백신, 수막알균 백신, 일본뇌염 백신, 황열 백신에 대해 다루었다. 이 중 폐렴사슬알균 백신, 파상풍-디프테리아-백일해 백신, 대상포진 백신, 인유두종바이러스 백신의 경우 백신 접종과 관련된 성인의 접종 권고사항이 일부 개정되었으며 인플루엔자 백신, 수막알균 백신, 일본뇌염 백신, 황열 백신은 최근 등장한 이슈에 대한 성인예방접종위원회의 의견을 정리하여 기술하였다. 본 개정안에서 다루지 않은 백신에 대해서는 '성인예방접종 2판'의 내용을 동일하게 유지하는 것이다.

### 폐렴사슬알균 백신

#### 〈폐렴사슬알균 백신의 권장대상과 접종 시기〉

- 가. 건강한 65세 이상의 고령자: 13가 단백결합 백신 또는 23가 다당류 백신을 접종한다.
- 나. 65세 이상 만성질환자(만성 심혈관 질환, 만성 폐질환, 당뇨병, 알코올 중독, 만성 간질환)
  - 1) 과거에 어떤 종류의 폐렴사슬알균 백신도 접종한 적이 없는 65세 이상 만성질환자: 13가 단백결합 백신을 먼저 접종하고 6-12개월이 지난 후에 23가 다당류 백신을 접종한다. 13가 단백결합 백신 접종과 23가 다당류 백신의 동시접종은 피해야 하며 최소 8주 이상 간격을 두어야 한다.
  - 2) 과거에 13가 단백결합 백신을 접종받은 65세 이상 만성질환자: 13가 단백결합 백신의 재접종은 필요하지 않으며 23가 다당류 백신으로 1회에 한하여 추가 접종한다.
  - 3) 과거에 13가 단백결합 백신을 접종받지 않았으나 23가 다당류 백신을 접종 받은 65세 이상 만성질환자
    - 65세 이전에 23가 다당류 백신을 접종받은 경우: 13가 단백결합 백신은 과거 23가 다당류 백신 접종으로부터 1년 이상 간격을 두고 접종해야 한다. 23가 다당류 백신을 1회에 한하여 재접종하며 과거 23가 다당류 백신 접종으로부터

Received: ?, 2015

**Corresponding Author :** Hee Jin Cheong, MD, PhD, Division of Infectious Disease, Department of Internal Medicine, Korea University Guro Hospital, Korea University College of Medicine, 148 Gurodong-ro, Guro-gu, Seoul 152-703, Korea  
Tel: +82-2-2626-3050, Fax: +82-2-2626-1105, E-mail: heejinmd@korea.ac.kr

터 5년 이상, 13가 단백결합 백신 접종으로부터 6-12개월 (최소 8주 이상) 간격을 두고 재접종해야 한다.

- 65세 이후에 23가 다당류 백신을 접종받은 경우: 과거 23가 다당류 백신 접종으로부터 1년 이상 간격을 두고 13가 단백결합 백신을 접종한다. 23가 다당류 백신의 추가 접종은 권고하지 않는다.

다. 18-64세 만성질환자(만성 심혈관 질환, 만성 폐질환, 당뇨병, 알코올 중독, 만성 간질환): 13가 단백결합 백신을 우선적으로 접종하고, 13가 단백결합 백신을 접종할 수 없다면 23가 다당류 백신을 접종한다

라. 18세 이상의 면역저하환자(선천성 또는 후천성 면역 저하, HIV 감염, 만성 신부전 또는 신증후군, 백혈병, 림프종, 호지킨씨 병, 종양질환, 장기간 스테로이드를 포함하는 면역억제제를 투여하거나 방사선 치료를 받고 있는 환자, 장기 이식환자)와 기능적 또는 해부학적 무비증, 뇌척수액 누수, 인공와우를 삽입한 환자

- 1) 폐렴사슬알균 백신 접종력이 없는 경우: 13가 단백결합 백신을 먼저 접종하고, 최소 8주가 지난 후에 23가 다당류 백신을 접종한다.
- 2) 23가 다당류 백신을 1회 접종한 경우: 23가 다당류 백신 접종 후 최소 1년의 기간이 지난 후 13가 단백결합 백신을 접종한다. 13가 단백결합 백신 접종 후 최소 8주 경과하였고 23가 다당류 백신 접종 후 5년 이상 경과하였다면 23가 다당류 백신을 접종한다.
- 3) 23가 다당류 백신을 2회 접종한 경우: 마지막 접종 후 최소 1년이 경과한 시점에서 13가 단백결합 백신을 1회 접종한다.

## 1. 성인 대상 13가 단백결합 폐렴사슬알균 백신의 허가

2013년 10월 우리나라 식품의약품안전처는 13가 단백결합 폐렴사슬알균 백신(13-valent pneumococcal conjugate vaccine; PCV13)을 18세 이상 모든 성인에게 사용할 수 있도록 허가연령을 확대하였다.

이전부터 사용되어 온 23가 다당류 폐렴사슬알균 백신(23-valent pneumococcal polysaccharide vaccine; PPSV23)의 경우, 임상적 경험 이 많고 23가지 혈청형을 포함하고 있으며 침습성 폐렴사슬알균 감염증에는 어느 정도 예방효과가 있는 것으로 알려져 있다[1, 2]. 그러나 PPSV23은 폐렴을 예방하는 효과를 보여주지 못하였으며 폐렴사슬알균 감염증의 고위험군인 기저질환이 있는 환자에서 충분한 예방효과를 보여주지 못하였다. 또한 PPSV23은 T-세포 비의존성 면역 반응을 일으켜 효과의 지속기간이 5년 정도로 짧으며 군중면역을 유도하지 못한다.

PPSV23에 비해 PCV13은 T-세포 의존성 면역 반응을 통해 면역기억 반응을 유도하고 소아에서 침습성 폐렴사슬알균 감염증의 예방뿐 아니라 폐렴, 중이염의 예방, 비인두 집락률 감소효과가 뚜렷하다[1]. 현재까지 소아에서 백신에 포함된 혈청형에 의한 폐렴 사슬알균 감

염증을 90%이상 감소시켰으며, 폐렴사슬알균 백신을 접종하지 않은 성인에서도 침습성 폐렴사슬알균 감염증 발생빈도가 감소하는 군중면역 효과도 있는 것으로 보고되고 있다[1]. 또한 최근 약 85,000명의 65세 이상 성인을 대상으로 수행된 이중맹검, 무작위 배정, 위약 대조군 연구(community-acquired pneumonia trial in adults, CAPiTa)에서 백신 혈청형의 폐렴사슬알균 지역사회 폐렴에 대해 46%, 백신 혈청형의 비균혈증/비침습적 폐렴사슬알균 지역사회 폐렴에 대해 45%, 백신 혈청형의 침습성 폐렴사슬알균 감염증에 대해 75%로 예방 효과가 있음이 입증되었다[3]. 18세 이상 성인을 대상으로 시행한 임상연구에서 PCV13은 PPSV23과 비교해서 면역원성은 우수하거나 비슷하였고, 이상반응 발생률은 비슷하였다[4-6]. 에이즈 환자를 대상으로 시행한 연구에서도 PCV13은 면역원성이 PPSV23보다 우수하고, 침습성 폐렴사슬알균 감염증의 재발에 예방효과가 있음이 입증되었다[7, 8].

성인에서 폐렴사슬알균 백신의 비용편익을 평가한 연구들을 살펴보면, 공통적으로 소아의 PCV13 접종을 통한 군집면역 수준과 비침습성 폐렴에 대한 예방효과 여부를 비용편익을 결정하는 핵심요소로 제시하고 있다. 즉, 소아의 PCV13 접종을 통한 군집면역 수준이 낮고, 성인에서 PCV13의 비침습성 폐렴에 대한 예방효과가 소아 수준 이상이라면 65세 이상 노인인구 고위험군에 대한 PCV13 접종이 PPSV23과 비교해 비용 효과적일 것이라는 예상할 수 있다. 실제로, 미국과 유럽의 일부 국가에서 소아 대상의 단백결합백신 필수예방접종이 도입된 이후 소아의 침습성 폐렴사슬알균 감염은 현저히 감소하였고, 성인에서도 군집면역을 통해 감소하는 경향을 보였다. 그러나, 65세 이상 성인에서는 소아 연령처럼 뚜렷한 감소를 보이지는 못했다[9, 10].

## 2. 폐렴사슬알균 감염질환의 발생양상과 혈청형 분포

침습성 폐렴사슬알균 감염증은 5세 미만에서 많이 발생하고 이후에는 감소하였다가 다시 50세 이상에서 증가하기 시작하는 U자 모양을 보이는 것으로 알려져 있다. 미국의 경우 65세 이상에서 발생하는 침습성 폐렴사슬알균 감염증에 대해 PCV13의 혈청형이 1/3 정도만 차지하고 있으며, PPSV23에 포함되어 있고 PCV13에는 포함되지 않는 11개의 혈청형이 25% 정도를 차지하고 있다[11]. 19세 이상 면역저하환자에서는 PCV13의 혈청형이 50% 정도를 차지하고 있으며, PPSV23에 포함되어 있고 PCV13에는 포함되지 않는 11개의 혈청형이 21% 정도를 차지하고 있다[12]. 우리나라의 경우, 18세 이상 성인을 대상으로 시행된 최근 연구 결과 1,000명의 입원 환자당 0.36명의 침습성 폐렴사슬알균 감염증 환자가 있었으며, 치명률은 약 30% 정도로 보고되고 나이가 증가할수록 환자수가 많아지고 치명률이 높아졌고 64.9%가 기저질환을 가지고 있었다[13]. PCV13이 도입되기 이전 19세 이상 성인에서 발생한 폐렴사슬알균 감염증의 혈청학적 분포에 대한 연구 결과, PCV7에 포함되는 혈청형은 39.8%, PCV13은 67.3%, PPSV23은 73.4%를 차지하였다[14]. 그러나 PCV13이 도입된 이후 폐렴사슬알균 감염증에서 PCV13과 PPSV23의 혈청형이 차지하

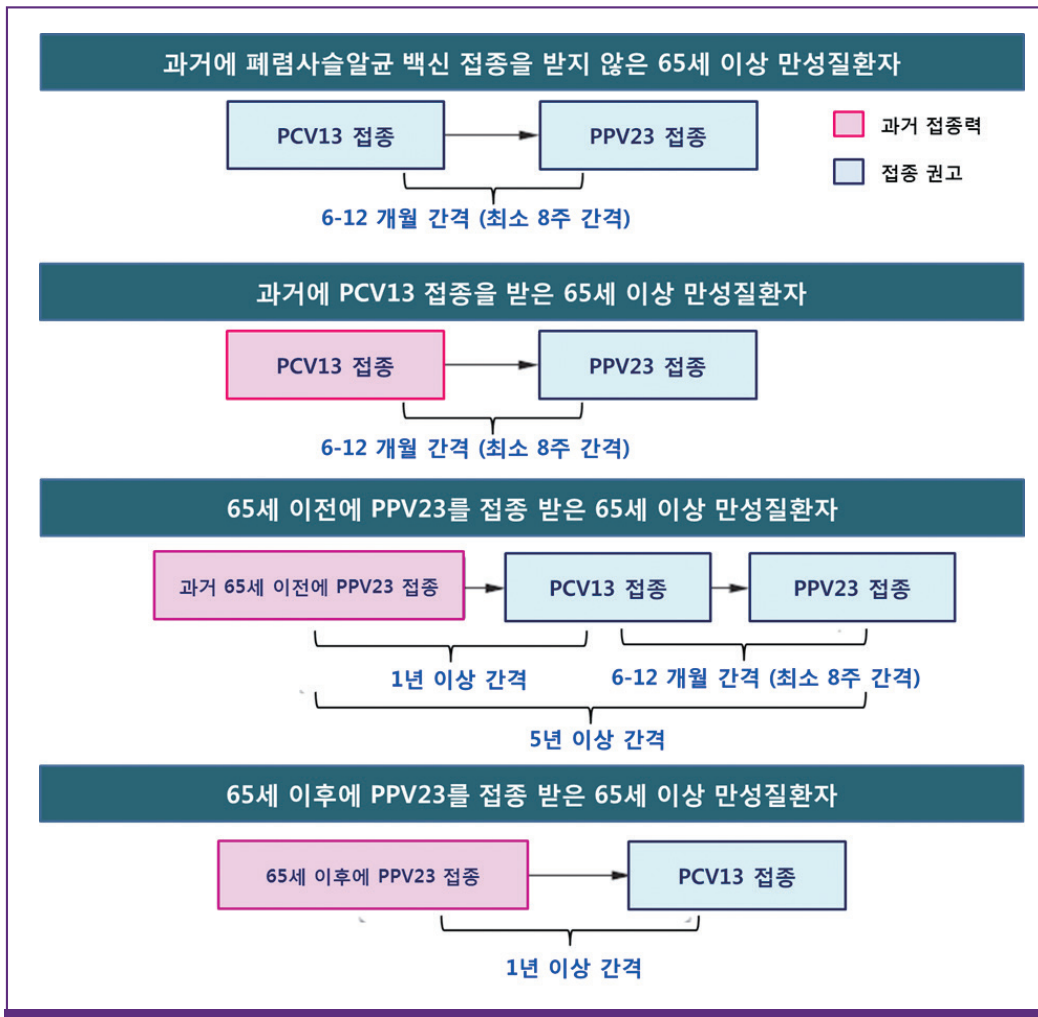

그림 1. 65세 이상 만성질환자의 폐렴사슬알균 백신 접종 권고.

PCV13, 13-valent pneumococcal conjugate vaccine; PPV23, 23-valent pneumococcal polysaccharide vaccine.

는 비율은 모두 감소 추세를 보이고 두 백신의 혈청형이 차지하는 비율의 차이는 15-20%로 나타났다[2]. 또한 백신에 포함되지 않은 혈청형에 의한 감염이 증가되는 추세를 보이고 있다.

### 3. 대한감염학회의 폐렴사슬알균 백신 접종 권고

미국 예방접종자문위원회(Advisory Committee on Immunization Practice; ACIP)는 2014년 폐렴사슬알균 백신 접종권고 개정안에서 모든 65세 이상 고령자에게 PCV13과 PPV23을 순차적으로 접종하도록 권고를 강화하였다[15]. 65세 이상 성인에서 소아 예방접종을 통해 얻은 불충분한 군집면역 수준, CAPITA 연구를 통해 입증된 PCV13의 폐렴사슬알균 폐렴에 대한 예방효과, 그리고 비용-효과 분석 결과 등을 고려한 것이다. 우리나라는 사망의 원인 중 폐렴이 차지하는 비율이 점차 증가하고 있으며 국내에서 발생하는 폐렴의 경우에도 폐렴사슬알균이 가장 흔한 원인으로 보고되고 있다는 점에서 폐렴을 포함한 비침습성 폐렴사슬알균감염증에 대한 예방효과를 보이는 PCV13의 접종은 필요하다. 또한 PCV13 도입 이후 미국, 유럽과 마찬가지로 PCV13과 PPV23의 혈청형이 차지하는 비율의 차이가 커지는 경향을 보이고 있어 PCV13과 PPV23의 순차적인接种의 필요성

도 있다. 그러나 국내 65세 이상 고령자에서 PCV13의 비용-효과를 평가한 자료가 없는 상황에서 모든 65세 이상 고령자에게 일률적으로 PCV13과 PPV23의 순차적 접종을 권고할 만한 근거는 아직 부족하다.

PCV13과 PPSV23의 선택에 있어 또 한 가지 고려할 점은 접종 순서에 따른 면역반응이다. PCV13과 PPSV23을 모두 투여하는 경우, PCV13을 먼저 투여하면 면역 증강 현상(booster effect)이 나타나고, PPSV23을 먼저 투여하는 경우 면역 저하 현상(hypo-responsiveness)이 발생한다는 사실이 보고되어 두 가지 백신을 모두 접종해야 하는 경우 PCV13을 먼저 접종하는 것이 유리할 수 있음이 알려졌다[16,17].

이에 성인예방접종위원회는 건강한 65세 이상 고령자에 대해서 PCV13 또는 PPV23을 선택적으로 접종하도록 권고하였다. 그러나 65세 이상 만성질환자는 다양한 혈청형에 의한 중증 폐렴사슬알균 감염증의 위험이 높기 때문에 PCV13을 우선 접종하고 6-12개월 이후에 PPV23을 추가 접종할 것을 권고하였다. 단, PCV13과 PPV23의 동시접종은 권고하지 않으며 최소 8주의 간격을 두고 접종해야 한다(그림 1).

## 파상풍-디프테리아-백일해 백신

### 〈임산부 또는 임신 예정인 여성에 대한 파상풍-디프테리아-백일해 백신 접종 권고〉

가. 성인형 파상풍-디프테리아-백일해(Tdap) 백신의 접종력이 없는 여성은 출산 직후에, 혹은 임신 전에 1회 접종하도록 권고한다. 임신 27-36주의 임신부에게도 접종할 수 있다.

### 1. 국외의 임신부 대상 파상풍-디프테리아-백일해 백신 접종 권고

미국예방접종 자문위원회는 2013년부터 성인형 파상풍-디프테리아-백일해(Tetanus-diphtheria-acellular pertussis; Tdap) 백신을 매 임신시마다 접종하도록 권고하고 있다[18]. 미국은 2000년대 초중반부터 전국적으로 백일해 발생이 증가하고 있어 2006년부터 Tdap 백신 접종력이 없는 임신부에서 출산 직후 접종과 신생아와 직접적으로 접촉하는 가족구성원 및 양육자에게 접종하도록 권고하였다. 그러나 이러한 'cocooning'은 효과를 거두지 못하였고 실제로 신생아가 첫 소아형 파상풍-디프테리아-백일해(DTaP) 백신이 접종되는 생후 2개월까지 고스란히 백일해의 위험에 노출된다는 단점을 보완할 수 없다. 2011년 6월 미국 ACIP는 이를 보완하기 위하여 임신부에서 Tdap 백신을 임신 중에 접종하도록(임신 20주 이후) 권고하여 이러한 문제점을 극복하고자 하였다. 그러나 접종을 권고받은 임신부의 2.6%만이 이를 수용함으로써 역시 실효성을 평가할 수 없었다. 2012년 미국에서 백일해 환자가 48,277명이 보고되어 예년에 비해 2-3배 증가하자 미국예방접종 자문위원회는 신생아에서 백일해 질병 부담, 성인에서의 Tdap 백신의 안전성, 소아기 접종으로 획득된 백일해 면역원성의 쇠퇴 등을 고려하여 매 임신마다, 이전의 Td/Tdap 백신의 접종력은 고려하지 말고, 임신 27-36주 사이에 Tdap 백신을 접종하도록 강화하였다. 임신 중 접종을 통해 모체에서 충분한 항체를 확보하고 이를 신생아에게 넘겨줌으로써 첫 2개월간의 면역 공백을 없앨 수 있다는 판단이다. 이에 대한 근거는 첫 아이 출산 후 Tdap 백신의 접종은 둘째 아이 출산시에 모체에서는 물론 태아에서도 백일해에 대한 높은 항체가를 유지할 수 있다는 것[19], 임신 기간 중 어느 때라도 Tdap을 접종한 경우 출산시 충분히 높은 항체가를 유지한다는 것[20], 임신 초기보다는 중후기에 접종하는 것이 신생아의 첫 DTaP 접종시기까지 보호 항체가를 유지한다는 점[21], 임신중 투여에도 신생아와 산모에 위중한 이상반응이 없다는 점[22] 등이다. 또한 가족구성원, 양육자에 대한 접종 권고도 강화하고 있다. 2011년에는 64세 이전의 접종력이 없는 성인에게 권고하되 65세 이상인 경우 생후 12개월 이내의 소아가 있는 경우 접종하도록 권고하였으나[23], 2013년에는 접종력이 없는 모든 성인[24], 2014년에는 접종력이 없는 11세 이상 인구군에서 접종하도록 권고하여[25] 직간접적으로 cocooning에도 역점을 두고 있다.

영국의 경우 2012년에 8,819건의 백일해가 보고되어 전해에 비해 10배 이상 증가하였고 13명의 신생아가 사망하였다. 이에 영국 역시 미국과 마찬가지로 2013년 이후 매 임신마다 접종할 것을 권고하고 있으며 접종 권장시기는 임신 28-38주 사이로 미국과 약간 차이가 있으며 가급적 28-32주에 접종하도록 권고하고 있다[26]. 캐나다는 성인이 된 후에 Tdap 백신 접종력이 없는 임신부는 출산 직후 1회 접종하도록 권고하고 있다[27]. 다만 지역 사회에서 백일해가 유행하면 임신 26주 이후의 임신부에게 접종하도록 권고하였다. 호주의 경우는 임신 전에, 혹은 출산 직후에 접종하도록 하는 것을 우선적으로 권고하며, 임신 3기에 접종하는 것을 차선으로 권고한다. Tdap을 접종하였더라도 출산 시점에 5년이 경과하였다면 다시 추가접종할 것을 권고한다[28].

### 2. 대한감염학회의 임신부 또는 임신 예정인 여성에 대한 파상풍-디프테리아-백일해 백신 접종 권고

대한감염학회는 2012년 발간한 '성인예방접종 2판'에서 임신부에서의 Tdap 백신 접종은 임신 전에 혹은 출산직후에 1회 접종하도록 권고하였다. 시기적으로 미국이나 영국에서의 권고안이 변경되기 전으로 당시 미국 예방접종 자문위원회의 권고안과 크게 다르지 않다. 우리나라에서의 백일해 발생빈도는 1995년부터 2008년까지 한 해 평균 11.4건이었으나 2009년 66건, 2010년 27건, 2011년 97건으로 미국과 유사한 양상으로 증가하였으며[29], 2012년 전남지역에서의 유행 발생으로 230건이 보고되었다[30]. 다행스럽게도 2013년에는 다시 45건으로 감소한 상태이다. 현재 우리나라의 백일해 역학을 고려할 때 미국이나 영국과 같이 매 임신마다 접종해야 할 근거는 부족하며 추후 국내에서의 발생 추이와 유행발생 여부에 따라 다시 판단하여야 할 것으로 생각된다. 따라서 Tdap 백신의 접종력이 없는 여성은 출산 직후에 1회 접종하거나 임신 전에 접종하도록 기존의 방침대로 권고한다. 다만 임신 중 접종의 이점과 안전성 역시 근거가 분명하므로 임신 27-36주의 임신부에게도 접종할 수 있다. 또한 국내에서도 가족 구성원에 의한 신생아 백일해 감염의 증거가 분명한 만큼 신생아의 Tdap 백신 접종력이 없는 부모, 조부모에서 적극적인 접종이 이루어지도록 일차 진료를 담당하는 의료인을 상대로 교육하고, 관계기관에서도 적극적으로 홍보하는 것이 필요하다.

## 대상포진 백신

### 〈대상포진 백신의 권장대상과 접종 시기〉

- 가. 60세 이상 성인은 금기사항이 없는 한 대상포진 백신의 접종을 권고한다.
- 나. 50-59세 성인은 개별 피접종자의 상태에 따라 대상포진 백신의 접종 여부를 결정한다.

2011년 7월 국내 식품의약품안전처는 대상포진 백신(ZOSTAVAX®)의 사용 허가 연령을 기존 60세 이상에서 50세 이상으로 확대하여 낮추었다. 그러나 2011년 대한감염학회에서 대상포진 백신의 접종 권고 당시 50-59세 성인에 대해서는 백신 접종 권고 여부를 보류하였다. 이는 허가 연령 확대의 근거가 되었던 ZEST Study 결과가 당시 공식적으로 발표되지 않아 이에 대한 검증이 불가능했기 때문이다. 그러나 2012년 ZEST Study 결과가 공식적으로 보고되면서 이에 대한 검증이 가능해졌다. ZEST Study 결과, 대상포진 백신은 50-59세 성인에서 대상포진의 발병을 69.8% (95% CI, 54.1-80.6) 감소시키는 결과를 보여주었다[31]. 이상반응의 경우, 백신 접종군의 73%, 위약군의 42%에서 한 가지 이상의 이상반응을 보고하였는데, 이상반응 발생률의 차이는 주로 국소 반응에 의한 것이었으며 이전 Shingles Prevention Study 결과와 큰 차이는 없었다. 그러나 ZEST Study에서는 대상포진 후 신경통의 발생 건수가 많지 않아 이를 예방하는 효과에 대해서는 평가하지 못하였다.

이에 2013년 8월 20일 대한감염학회 성인예방접종위원회는 ZEST study 결과를 공식적으로 검토하였고 이전 Shingles Prevention Study 결과와 동일한 수준의 근거로 판단하였다. 다만, ZEST study에서는 대상포진 후 신경통의 예방효과가 확인되지 않았고 최근 대상포진 백신의 장기면역원성 및 재접종과 관련된 논란이 남아 있는 상태여서 50-59세 성인에 대한 대상포진 백신 접종 여부는 개별 피접종자의 상태에 따라 이득-손실을 면밀히 감안하여 접종 여부를 결정할 것을 권고하였다. 미국 ACIP의 경우에도 50-59세 성인에 대한 대상포진 백신의 일괄적인 접종은 권고하지 않았으며, 만성 통증, 심한 우울증, 기저질환 등으로 인해 대상포진이나 대상포진 후 신경통에 따른 통증에 민감하게 반응할 것으로 예상되는 인자가 있는 경우 개별 피접종자의 상태에 따라 접종을 고려할 수 있다고 권고한 바 있다[32]. 더불어 국내 인구집단에서 대상포진 백신의 비용-효과에 대한 연구 결과가 여전히 없으며 대상포진 백신의 장기면역원성 및 재접종의 필요성, 과거 대상포진의 병력이 있는 성인에서 어느 정도 기간이 지난 후 백신 접종을 하는 것이 적절한지, 만성질환자에서 대상포진 백신의 비용-효과 등에 대한 논란도 여전히 있으므로 이에 대한 추가적인 연구 수행이 필요하다.

## 인유두종바이러스 백신

### 〈남성에 대한 인유두종바이러스 백신 접종 권고〉

가. 9-26세 남성은 항문암, 생식기사마귀 및 전암성 또는 이형성 병변의 예방을 위해 4가 인유두종바이러스 백신 접종이 가능하다.

## 1. 남성의 인유두종바이러스 백신 접종 권고

4가 인유두종바이러스 백신의 경우, 인유두종바이러스(human herpesvirus; HPV) 16과 18이 관련하는 음경암, 구강암, 구인두암, 항문암 및 HPV 6과 11이 관련하는 생식기 사마귀와 재발성 호흡기 유두종의 발생을 예방하기 위하여 9-15세 남아에게 접종할 수 있었다. 또한 이론적으로 남아가 인유두종바이러스 백신을 접종받는 경우 미래에 성파트너의 자궁경부암 예방효과를 기대할 수 있다. 최근 연구보고에 따르면 4,000명 이상의 16-26세의 남성을 대상으로 한 3상 임상시험에서 4가 백신은 HPV 6, 11, 16, 18에 의한 항문암, 생식기사마귀 및 전암성 또는 이형성병변의 발생을 감소시켰다[33, 34]. 또한 우리나라 식품의약품안전처는 4가 백신의 접종연령을 26세 성인 남성까지 확대 승인하였다. 따라서 국내 9-26세 남성에서 항문암, 생식기사마귀 및 전암성 또는 이형성병변의 예방을 위해 4가 인유두종바이러스 백신 접종이 가능하다.

미국의 경우 11-12세 남아들에게 인유두종바이러스 백신 접종을 일괄적으로 권고하고 있으며 13-21세 남성은 따라잡기 접종을 권고하였고 22-26세 남성은 접종을 고려할 수 있다고 권고하고 있다[35]. 또한 HIV 감염인을 포함한 모든 면역저하자과 남성동성애자는 26세 전에 4가 인유두종바이러스 백신의 접종을 권고하였다. 그러나 우리나라의 경우 연령별 백신 접종률의 경제적인 비용대비 효과에 대한 연구 결과가 충분하지 않아 연령별로 접종 권고를 나누어 기술하기 어렵다. 다만 남성에서 질병예방효과가 대개 남성동성애자를 대상으로 수행된 연구였고 HIV 감염 남성이나 남성동성애자의 경우 인유두종바이러스 감염으로 인한 질병 발생 가능성이 더 높으므로 우리나라에서도 이러한 남성들에 대해 인유두종바이러스 백신 접종을 더 고려할 필요가 있다.

## 2. 인유두종바이러스 백신의 안전성

최근 인유두종바이러스 백신의 안전성과 관련된 문제가 일부 제기되었다. 그러나 세계보건기구(World Health Organization, WHO)는 2013년 7월과 2014년 2월, 2회에 걸친 국제백신 안전성 자문위원회(Global Advisory Committee on Vaccine Safety, GACVS)를 통해 전세계 안전성 정보를 수집하여 종합 분석한 결과, 자궁경부암 백신의 안전성에 문제가 없다고 발표하였다[36, 37]. 또한 2014년 3월 우리나라 식품의약품안전처는 일본학회에서 일부 학자들이 제기한 자궁경부암 예방백신 함유 면역증강제의 안전성과 관련하여 현재까지 안전성에 문제가 없다고 발표하였다[38]. 문제가 된 수산화알루미늄은 자궁경부암 백신뿐만 아니라 간염, 폐렴구균, 디프테리아·파상풍·백일해(DTP) 백신 등의 효과를 높이기 위하여 일반적으로 사용하는 안전성이 확보된 면역증강제이다. 참고로, 미국 식품의약품국(Food and Drug Administration; FDA)은 알루미늄 최대 노출량이 영아의 건강에 영향을 미치는 수준 이하이기 때문에 안전하다고 발표한 바 있으며[39], WHO도 백신에 함유된 알루미늄은 안전하다는 입장을 발표하였다[40].

## 인플루엔자 백신

### 1. 임신부 우선접종순위

임신부는 일반인구와 비교해 중증 인플루엔자 감염과 합병증 발생의 위험이 높은 것으로 알려져 있다. 1918년 인플루엔자 대유행 시 인플루엔자 유사증상(influenza-like illness, ILI)이 있는 1,350명의 임신부를 조사한 결과, 43% (585명)에서 폐렴이 합병되었고 이중 52% (302명)가 유산하였다[41]. 임신부의 사망률은 27%에 달했고, 임신 3기의 사망률이 가장 높았다. 1957년 인플루엔자 대유행 시 미네소타에서는 임신과 관련된 사망의 원인으로 인플루엔자가 20%를 차지했고, 사망한 가임기 여성의 반수가 임신부였다[42]. 2009년 인플루엔자 대유행 시에도 임신부는 비임신부에 비해 입원율이 높았고, 중증감염으로 인한 사망 위험이 높게 나타났다. 미국에서는 2009년 대유행 시 일반인구에 비해 임신부의 입원율이 4배 이상 높았던 것으로 추정하였고[43], 중환자실에 입원한 임신부의 20%가 사망하였다[44]. 뿐만 아니라 인플루엔자 감염은 조산, 저체중 출산 및 신생아 사망의 위험을 높이는 것으로 나타났다[45]. 이를 근거로 2012년 WHO는 임신부를 인플루엔자 백신 접종 권고 대상의 최고 우선순위로 선정하고, 임신주수와 상관없이 불활화 인플루엔자 백신 접종을 받도록 임신부에게 권고하였다[46]. 국내 임신부에서의 인플루엔자 질병부담 연구는 많이 부족한 상태이다. 2009년 대유행 시 ILI로 8개 병원을 방문한 19,727명의 가임기 여성 중 인플루엔자 A(H1N1)pdm09 감염이 확인된 임신부는 150명이었고, 그 중 중증감염자는 없었다[47]. 그러나, 일개 대학병원 연구에서는 5명의 임신부가 인플루엔자 A(H1N1)pdm09 감염으로 입원하였으며 그 중 1명이 사망하였다고 보고하기도 하였다[48]. 임신부에서 인플루엔자 감염이 조산, 저체중 출산, 사산 등의 임신 합병증을 높이는지 여부에 대한 국내 자료는 전무하며 추가적인 연구가 필요하다.

임신부와 태아에 대한 안전성의 측면에서 인플루엔자 백신 접종과 임신의 연관성을 평가한 여러 연구 결과가 발표되었다. 임신부의 인플루엔자 백신 접종은 조산, 저체중 출산 등의 위험을 높이지 않고 안전했으며, 접종을 받은 산모뿐만 아니라 산모에서 태어난 영아에서도 인플루엔자 예방효과를 기대할 수 있었다[49-52]. 실제로, 6개월 미만 영아에서의 인플루엔자 질병부담이 크지만 백신 접종이 허가되어 있지 않아서 인플루엔자 백신 접종을 받은 어머니로부터 얻는 간접면역 획득이 매우 중요하다.

따라서 임신부와 인플루엔자 유행 시기에 임신 예정인 가임기 여성은 인플루엔자 백신 접종을 최우선순위로 고려되어야 한다. 임신부는 임신주수와 상관없이 접종권장시기(10-12월)에 불활화 인플루엔자 백신 접종을 권장한다. 그러나, 국내 임신부의 임신중 인플루엔자 백신 접종률은 4-20.9%로 고령자와 만성질환자에 비해서 현저히 낮은 수준에 머물러 있다[53-55]. 임신부의 인식도 개선을 위한 홍보와 교육, 무료접종 등 접종률을 높이기 위한 노력이 필요하다.

### 2. 4가 인플루엔자 백신

국내에서 현재 사용되는 인플루엔자 백신은 A/H3N2, A/H1N1, B 등 세 가지 인플루엔자 바이러스에 대한 항원을 포함하는 3가 백신이다. 그러나, B형 인플루엔자 바이러스는 항원 형에 따라서 B/Victoria와 B/Yamagata 두 가지 계통(lineage)으로 나뉘게 되며, 계통 간의 교차면역원성은 미미하다.

WHO는 해마다 북반구와 남반구에서 각각 유행이 예측되는 계통의 백신주를 선정하는데, 최근 10년간 유행한 B형 인플루엔자 백신주와 주된 유행주의 계통이 50%에서 일치하지 않았으며, 두 가지 계통의 바이러스가 동시에 유행하는 경우도 많았다[56]. 미국의 경우는 2001-2011년 사이의 10절기 중에 5절기 동안 B형 인플루엔자 백신주와 주유행주 계통의 불일치(mismatch)를 보였고, 분리된 바이러스의 46%가 백신주와 다른 계통이었다. 유럽의 경우도 마찬가지로 2003-2011년 사이의 8절기 중 4절기의 B형 인플루엔자 백신주와 주된 유행주의 불일치를 보였고, 분리된 바이러스의 58%가 백신주와 다른 계통에 속했다[56]. 질병관리본부 자료에 따르면 국내에서도 2009년 대유행 이후 두 가지 계통의 B형 인플루엔자 바이러스가 절기마다 동시에 유행하는 양상을 보여주고 있다[57-59]. B형 인플루엔자 바이러스의 백신주-유행주 계통 불일치 및 동시유행 양상은 인플루엔자 백신 효과를 떨어뜨리는 중요한 요인으로 생각되고 있으며, WHO는 2013-2014 절기부터 두 가지 계통의 B형 인플루엔자 바이러스주를 포함하는 4가 백신 접종을 권장하기 시작했다[60].

4가 인플루엔자 백신 허가를 위한 임상시험 결과에 따르면, 4가 백신은 3가 백신과 비교해 비열등 면역원성을 보였으며, 국소 및 전신 이상반응 발생에 차이를 보이지 않았다[61, 62]. 또한, 5,168명의 3-8세 소아를 대상으로 한 대규모 효능평가 임상시험에서 4가 백신은 59.3%의 인플루엔자를 예방하였으며, 중등도 또는 중증 인플루엔자 감염의 예방에도 높은 효능(74.2%)을 보였다[63].

2012년 이후에 네 종류의 계란기반 4가 인플루엔자 백신이 개발되어 미국 식약청의 허가를 받았다[56]. 플루아릭스(Fluarix® Quadrivalent, GlaxoSmithKline), 플루존(Fluzone® Quadrivalent, Sanofi Pasteur), 플루라발(Flulaval® Quadrivalent, ID Biomedical Corporation/GlaxoSmithKline) 등 3가지 종류의 불활화 백신과 약독화 생백신 플루미스트(Flumist® Quadrivalent, MedImmune)가 시판되고 있다. 우리나라에서도 해마다 3-4월에 B형 인플루엔자 유행이 반복되고 있으며 B형 백신주와 유행주의 불일치 현상이 나타나고 있어 4가 백신 사용이 필요하다. 현재 국내에서도 4가 인플루엔자 백신을 개발해서 임상시험 중에 있다. 향후 소아와 성인에서 B형 인플루엔자의 질병부담과 4가 백신의 비용효과를 평가하는 연구가 필요하다.

### 수막알균 백신

현재 국내에 시판되고 있어 이용 가능한 수막알균 백신은 MenACWY-CRM (Menveo®)이다. Menveo®는 4가 단백결합 백신으로

2012년 5월 식품의약품안전처로부터 11-55세로 승인을 받았다. 한국군에서는 2012년 11월부터 모든 신병에게 Menveo®를 접종하고 있다. 2013년 3월에는 식품의약품안전처로부터 만 2-11세 사이로 승인을 받았고, 2014년 5월 접종 가능 연령이 생후 2개월 이상의 영유아로 확대되었다. 다른 4가 단백결합 백신 중 MenACWY-D (Menactra®)도 국내 시판을 계획 중이다.

국내에서 Menveo®가 이용이 가능해지면서 소아와 청소년을 중심으로 백신 접종이 꾸준히 증가하고 있다. 보체 결핍, 비장 절제술 또는 비장기능 저하환자 등의 수막알균 감염의 위험요인을 지속적으로 가지고 있는 경우에는 단백결합 백신을 2-6세에 처음 접종했다면 3년 후, 7세 이상에서 처음 접종한 경우에는 5년 후 재접종이 필요하다. 이후로도 감염 위험이 지속한다면 5년마다 재접종을 권장한다.

국내 발생에 대한 역학자료가 제한적이지만, 국내에서도 군입대시 뿐 아니라 일부 연령에 대해서는 적극적인 수막알균 예방접종이 필요할 것으로 판단된다. 국내에서 보고된 수막알균 감염 사례의 연령별 발생 분석에서 다른 나라와 유사하게 0-2세, 10-16세에서 환자 발생이 많음을 알 수 있다[64, 65]. 수막알균의 배양이 어렵고, PCR 검사법이 널리 사용되지 않으며, 많은 감염사례에서 특징적인 증상이 없음을 고려할 때 청소년층의 세균성 뇌수막염의 중요한 원인이라고 생각된다[66]. 참고로 미국 ACIP는 16-21세 청소년기가 4세 이후에서는 감염 위험이 제일 높은 나이여서 이 기간 동안 항체 역가를 유지하기 위해서, 11-15세에 결합 백신을 받은 사람은 5년 후 1회 재접종을 권하고 있다. 16-18세에 처음 받았으면 5년 즉 21세까지는 항체가 유지되므로 재접종을 권하지 않고 있다[67]. 이에 국내에서도 10-16세 청소년에서 수막알균 예방접종이 필요하며, 관련 역학연구가 진행되어야 한다.

## 일본뇌염 백신

생백신의 접종 일정이 변경되어 생후 12-23개월에 1회 접종하고 12개월 후 2차 접종을 한다[68]. 이전에서는 생후 12-23개월에 1회 접종하고 12개월 후 2차 접종하며, 이후 만 6세에 3차 접종을 하는 접종 일정이었다. 처음 3차 접종을 백신 스케줄로 권장할 당시 때 연구 결과에 따라 일정이 결정된 것이 아니라, 불활성화 백신의 일정을 참고하여 정하였다. 중국에서는 그간 축적된 연구 결과를 토대로 3회 접종에서 2회 접종(8개월, 2세)으로 일정을 변경하였다. 국내의 연구에서도 5-7세의 3차 접종 전에 모두 항체를 가지고 있어, 2회 접종으로 상당 기간 방어 항체를 가지고 있을 것으로 예상되며, 6세의 추가접종은 필요 없다고 판단하여 2회 접종으로 변경하였다. 더불어 일본뇌염 생백신의 국내 국가예방접종(National Immunization Program, NIP)에 포함되었다[69]. 일부에서 생백신 제조에 사용하는 백신 기질의 1차 세포에 대한 안전성 문제에 대한 우려를 제기하지만, WHO는 2013년에 생백신의 효능이 우수하고 안전하다는 결론을 내렸고, 국내에서도 NIP에 포함하게 되었다.

Vero cell 유래 Beijing-1 주 불활성화 백신이 2013년 국내에서 허가되어 2014년부터 사용되고 있다. Vero cell 유래 유전자 재조합 생백신은 황열 예방접종으로 사용되고 있는 YF17D를 벡터로 해서 YF17D 바이러스의 prM과 E 단백을 부호화하는 유전자를 SA14-14-2의 상응하는 유전자와 대체하며 만든 Chimeric 바이러스(ChimeriVax-JE)로 제조한 백신으로 국내에서도 2013년 허가를 받아 2014년부터 사용 예정이다.

## 황열 백신

2013년 5월 WHO의 Strategic Advisory Group of Experts (SAGE)는 황열 백신의 효과는 평생 유지되며, 10년마다 재접종 할 필요가 없다는 의견을 제시하였다[70]. 그러나 황열 백신의 접종 여부는 검역 대상으로, 현실적으로 황열 백신 재접종 여부는 각국의 검역 기준을 따를 수밖에 없다. 그러므로 황열 백신 접종증명서를 요구하는 모든 나라에서 10년마다 재접종이 필요 없음을 공인하기 전까지는, 10년마다 재접종해야 한다.

## References

1. Vila-Corcoles A, Ochoa-Gondar O. Preventing pneumococcal disease in the elderly: recent advances in vaccines and implications for clinical practice. *Drugs Aging* 2013;30:263-76.
2. Moberley S, Holden J, Tatham DP, Andrews RM. Vaccines for preventing pneumococcal infection in adults. *Cochrane Database Syst Rev* 2013;1:CD000422.
3. Bonten M, Bolkenbaas M, Huijts S, Webber C, Gault S, Gruber W, Grobbee D. Community acquired pneumonia immunisation trial in adults (CAPITA). 9th International Symposium on Pneumococci and Pneumococcal Diseases; 2014 Mar 9-13; Hyderabad, India. *ISPPD*; 2014;3:95.
4. Jackson LA, Gurtman A, van Cleeff M, Jansen KU, Jayawardene D, Devlin C, Scott DA, Emini EA, Gruber WC, Schmoele-Thoma B. Immunogenicity and safety of a 13-valent pneumococcal conjugate vaccine compared to a 23-valent pneumococcal polysaccharide vaccine in pneumococcal vaccine-naïve adults. *Vaccine* 2003;31:3577-84.
5. Jackson LA, Gurtman A, Rice K, Pauksens K, Greenberg RN, Jones TR, Scott DA, Emini EA, Gruber WC, Schmoele-Thoma B. Immunogenicity and safety of a 13-valent pneumococcal conjugate vaccine in adults 70 years of age and older previously vaccinated with 23-valent pneumococcal polysaccharide vaccine. *Vaccine* 2013;31:3585-93.

6. Bryant K, Frenck R, Gurtman A, Rubino J, Treanor J, Thompson A, Jones TR, Jayawardene D, Baxter LM, Gruber WC, Emini EA, Scott DA, Schmöle-Thoma B. Immunogenicity and safety of a 13-valent pneumococcal conjugate vaccine in adults aged 18-49 years, naïve to 23-valent pneumococcal polysaccharide vaccine. 2013 April 28; Berlin, Germany: ESCMID.
7. Ho YL, Brandão AP, de Cunto Brandileone MC, Lopes MH. Immunogenicity and safety of pneumococcal conjugate polysaccharide and free polysaccharide vaccines alone or combined in HIV-infected adults in Brazil. *Vaccine* 2013;31:4047-53.
8. French N, Gordon SB, Mwalukomo T, White SA, Mwafulirwa G, Longwe H, Mwaiponya M, Zijlstra EE, Molyneux ME, Gilks CF. A trial of a 7-valent pneumococcal conjugate vaccine in HIV-infected adults. *N Engl J Med* 2010;362:812-22.
9. Simonsen L, Taylor RJ, Schuck-Paim C, Lustig R, Haber M, Klugman KP. Effect of 13-valent pneumococcal conjugate vaccine on admissions to hospital 2 years after its introduction in the USA: a time series analysis. *Lancet Respir Med* 2014;2:387-94.
10. Harboe ZB, Dalby T, Weinberger DM, Benfield T, Mølbak K, Slotved HC, Suppli CH, Konradsen HB, Valentin-Branth P. Impact of 13-valent pneumococcal conjugate vaccination in invasive pneumococcal disease incidence and mortality. *Clin Infect Dis* 2014;59:1066-73.
11. Centers for Disease Control and Prevention (CDC). Licensure of 13-valent pneumococcal conjugate vaccine for adults aged 50 years and older. *MMWR Morb Mortal Wkly Rep* 2012;61:394-5.
12. Centers for Disease Control and Prevention (CDC). Use of 13-valent pneumococcal conjugate vaccine and 23-valent pneumococcal polysaccharide vaccine for adults with immunocompromising conditions: recommendations of the Advisory Committee on Immunization Practices (ACIP). *MMWR Morb Mortal Wkly Rep* 2012;61:816-9.
13. Song JY, Choi JY, Lee JS, Bae IG, Kim YK, Sohn JW, Jo YM, Choi WS, Lee J, Park KH, Kim WJ, Cheong HJ. Clinical and economic burden of invasive pneumococcal disease in adults: a multicenter hospital-based study. *BMC Infect Dis* 2013;13:202.
14. Kim SH, Song JH, Chung DR, Thamlikitkul V, Yang Y, Wang H, Lu M, So TM, Hsueh PR, Yasin RM, Carlos CC, Pham HV, Lalitha MK, Shimono N, Perera J, Shibl AM, Baek JY, Kang CI, Ko KS, Peck KR; ANSORP Study Group. Changing trends in antimicrobial resistance and serotypes of *Streptococcus pneumoniae* isolates in Asian countries: an Asian Network for Surveillance of Resistant Pathogens (ANSORP) study. *Antimicrob Agents Chemother* 2012;56:1418-26.
15. Tomczyk S, Bennett NM, Stoecker C, Gierke R, Moore MR, Whitney CG, Hadler S, Pilishvili T; Centers for Disease Control and Prevention (CDC). Use of 13-valent pneumococcal conjugate vaccine and 23-valent pneumococcal polysaccharide vaccine among adults aged ≥65 years: recommendations of the Advisory Committee on Immunization Practices (ACIP). *MMWR Morb Mortal Wkly Rep* 2014;63:822-5.
16. Greenberg RN, Gurtman A, Frenck RW, Strout C, Jansen KU, Trammel J, Scott DA, Emini EA, Gruber WC, Schmoele-Thoma B. Sequential administration of 13-valent pneumococcal conjugate vaccine and 23-valent pneumococcal polysaccharide vaccine in pneumococcal vaccine-naïve adults 60-64 years of age. *Vaccine* 2014;32:2364-74.
17. Jackson LA, Gurtman A, van Cleeff M, Frenck RW, Treanor J, Jansen KU, Scott DA, Emini EA, Gruber WC, Schmoele-Thoma B. Influence of initial vaccination with 13-valent pneumococcal conjugate vaccine or 23-valent pneumococcal polysaccharide vaccine on anti-pneumococcal responses following subsequent pneumococcal vaccination in adults 50 years and older. *Vaccine* 2013;31:3594-602.
18. Centers for Disease Control and Prevention (CDC). Updated recommendations for use of tetanus toxoid, reduced diphtheria toxoid, and acellular pertussis vaccine (Tdap) in pregnant women--Advisory Committee on Immunization Practices (ACIP), 2012. *MMWR Morb Mortal Wkly Rep* 2013;62:131-5.
19. Leuridan E, Hens N, Peeters N, de Witte L, Van der Meeren O, Van Damme P. Effect of a prepregnancy pertussis booster dose on maternal antibody titers in young infants. *Pediatr Infect Dis J* 2011;30:608-10.
20. Gall SA, Myers J, Pichichero M. Maternal immunization with tetanus-diphtheria-pertussis vaccine: effect on maternal and neonatal serum antibody levels. *Am J Obstet Gynecol* 2011;204:334. e1-5.
21. Healy CM, Rench MA, Baker CJ. Importance of timing of maternal combined tetanus, diphtheria, and acellular pertussis (Tdap) immunization and protection of young infants. *Clin Infect Dis* 2013;56:539-44.
22. Zheteyeva YA, Moro PL, Tepper NK, Rasmussen SA, Barash FE, Revzina NV, Kissin D, Lewis PW, Yue X, Haber P, Tokars JI, Vellozzi C, Broder KR. Adverse event reports after tetanus toxoid, reduced diphtheria toxoid, and acel-

- lular pertussis vaccines in pregnant women. *Am J Obstet Gynecol* 2012;207:59. e1-7.
23. Centers for Disease Control and Prevention (CDC). Updated recommendations for use of tetanus toxoid, reduced diphtheria toxoid and acellular pertussis (Tdap) vaccine from the Advisory Committee on Immunization Practices, 2010. *MMWR Morb Mortal Wkly Rep* 2011;60:13-5.
  24. Centers for Disease Control and Prevention (CDC). Updated recommendations for use of tetanus toxoid, reduced diphtheria toxoid, and acellular pertussis (Tdap) vaccine in adults aged 65 years and older - Advisory Committee on Immunization Practices (ACIP), 2012. *MMWR Morb Mortal Wkly Rep* 2012;61:468-70.
  25. Akinsanya-Beysolow I; Advisory Committee on Immunization Practices (ACIP); ACIP Child/Adolescent Immunization Work Group; Centers for Disease Control and Prevention (CDC). Advisory Committee on Immunization Practices recommended immunization schedules for persons aged 0 through 18 years - United States, 2014. *MMWR Morb Mortal Wkly Rep* 2014;63:108-9.
  26. Public Health England. Pertussis (whooping cough) immunisation for pregnant women 2014 Available at: <http://www.hpa.org.uk/Topics/InfectiousDiseases/Infection-sAZ/WhoopingCough/ImmunisationForPregnantWomen/>. Accessed 12 June 2014.
  27. Public Health Agency of Canada. Canadian immunization guide 2013. Available at: <http://www.phac-aspc.gc.ca/publicat/cig-gci/p03-04-eng.php>. Accessed 12 June 2014.
  28. Australian Government Department of Health. The Australian immunisation handbook 10th Edition 2013. Available at: <http://www.immunise.health.gov.au/internet/immunise/publishing.nsf/Content/handbook10-4-12>. Accessed 12 June 2014.
  29. Korea Centers for Disease Control and Prevention (KCDC). Disease web statistics system 2014. Available at: <http://is.cdc.go.kr/nstat/jsp/observation/stat/tot/STATTOT-0402List.jsp>. Accessed 12 June 2014.
  30. Kwon HJ, Yum SK, Choi UY, Lee SY, Kim JH, Kang JH. Infant pertussis and household transmission in Korea. *J Korean Med Sci* 2012;27:1547-51.
  31. Schmader KE, Levin MJ, Gnann JW Jr, McNeil SA, Vesikari T, Betts RF, Keay S, Stek JE, Bundick ND, Su SC, Zhao Y, Li X, Chan IS, Annunziato PW, Parrino J. Efficacy, safety, and tolerability of herpes zoster vaccine in persons aged 50-59 years. *Clin Infect Dis* 2012;54:922-8.
  32. Centers for Disease Control and Prevention (CDC). Update on herpes zoster vaccine: licensure for persons aged 50 through 59 years. *MMWR Morb Mortal Wkly Rep* 2011;60:1528.
  33. Giuliano AR, Palefsky JM, Goldstone S, Moreira ED Jr, Penny ME, Aranda C, Vardas E, Moi H, Jessen H, Hillman R, Chang YH, Ferris D, Rouleau D, Bryan J, Marshall JB, Vuocolo S, Barr E, Radley D, Haupt RM, Guris D. Efficacy of quadrivalent HPV vaccine against HPV Infection and disease in males. *N Engl J Med* 2011;364:401-11.
  34. Palefsky JM, Giuliano AR, Goldstone S, Moreira ED Jr, Aranda C, Jessen H, Hillman R, Ferris D, Coutlee F, Stoler MH, Marshall JB, Radley D, Vuocolo S, Haupt RM, Guris D, Garner EI. HPV vaccine against anal HPV infection and anal intraepithelial neoplasia. *N Engl J Med* 2011;365:1576-85.
  35. Centers for Disease Control and Prevention (CDC). Recommendations on the use of quadrivalent human papillomavirus vaccine in males--Advisory Committee on Immunization Practices (ACIP), 2011. *MMWR Morb Mortal Wkly Rep* 2011;60:1705-8.
  36. Anonymous. Global advisory committee on vaccine safety, 11-12 December 2013. *Wkly Epidemiol Rec* 2014;89:53-60.
  37. Anonymous. Global advisory committee on vaccine safety, 12-13 June 2013. *Wkly Epidemiol Rec* 2013;88:301-12.
  38. Ministry of Food and Drug Safety. Media press release. Available at: <http://www.mfds.go.kr/index.do?mid=676&pageNo=1&seq=23066&cmd=v>. Accessed 3 March 2014.
  39. U.S. Food and Drug Administration. Study Reports Aluminum in Vaccines Poses Extremely Low Risk to Infants. Available at: <http://www.fda.gov/biologicsbloodvaccines/scienceresearch/ucm284520.htm>. Accessed 5 January 2012.
  40. World Health Organization (WHO). Global Advisory Committee on Vaccine Safety, report of meeting held 6-7 June 2012. Available at: [http://www.who.int/vaccine\\_safety/committee/reports/Jun\\_2012/en/](http://www.who.int/vaccine_safety/committee/reports/Jun_2012/en/). Accessed 5 January 2012.
  41. Harris JW. Influenza occurring in pregnant women: a statistical study of thirteen hundred and fifty cases. *JAMA* 1919;72:978-80.
  42. Freeman DW, Barno A. Deaths from Asian influenza associated with pregnancy. *Am J Obstet Gynecol* 1959;78:1172-5.
  43. Jamieson DJ, Honein MA, Rasmussen SA, Williams JL, Swerdlow DL, Biggerstaff MS, Lindstrom S, Louie JK, Christ CM, Bohm SR, Fonseca VP, Ritger KA, Kuhles DJ, Eggers P, Bruce H, Davidson HA, Lutterloh E, Harris ML, Burke C, Cocoros N, Finelli L, MacFarlane KE, Shu B, Olsen SJ; Novel Influenza A (H1N1) Pregnancy Working

- Group. H1N1 2009 influenza virus infection during pregnancy in the USA. *Lancet* 2009;374:451-8.
44. Siston AM, Rasmussen SA, Honein MA, Fry AM, Seib K, Callaghan WM, Louie J, Doyle TJ, Crockett M, Lynfield R, Moore Z, Wiedeman C, Anand M, Tabony L, Nielsen CE, Waller K, Page S, Thompson JM, Avery C, Springs CB, Jones T, Williams JL, Newsome K, Finelli L, Jamieson DJ; Pandemic H1N1 Influenza in Pregnancy Working Group. Pandemic 2009 Influenza A(H1N1) virus illness among pregnant women in the United States. *JAMA* 2010;303:1517-25.
45. Mosby LG, Rasmussen SA, Jamieson DJ. 2009 pandemic influenza A (H1N1) in pregnancy: a systematic review of the literature. *Am J Obstet Gynecol* 2011;205:10-8.
46. Anonymous. Vaccines against influenza WHO position paper - November 2012. *Wkly Epidemiol Rec* 2012;87:461-76.
47. Kim BN, Kwak YG, Moon CS, Kim YS, Kim ES, Lee KS, Lee CS, Hur JA. Pandemic influenza (H1N1 2009) among pregnant Korean women. *Infect Chemother* 2011;43:55-9.
48. An JH, Kim HN, Choi OJ, Kim GS, Kim UJ, Jang MO, Kang SJ, Park KH, Jung SI, Kwon YS, Jang HC. Was 2009 pandemic influenza A (H1N1) mild among pregnant Korean women? *Chonnam Med J* 2013;49:96-9.
49. Thompson MG, Li DK, Shifflett P, Sokolow LZ, Ferber JR, Kurosky S, Bozeman S, Reynolds SB, Odouli R, Henninger ML, Kauffman TL, Avalos LA, Ball S, Williams JL, Irving SA, Shay DK, Naleway AL; Pregnancy and Influenza Project Workgroup. Effectiveness of seasonal trivalent influenza vaccine for preventing influenza virus illness among pregnant women: a population-based case-control study during the 2010-2011 and 2011-2012 influenza seasons. *Clin Infect Dis* 2014;58:449-57.
50. Legge A, Dodds L, MacDonald NE, Scott J, McNeil S. Rates and determinants of seasonal influenza vaccination in pregnancy and association with neonatal outcomes. *CMAJ* 2014;186:E157-64.
51. Nordin JD, Kharbanda EO, Vazquez Benitez G, Lipkind H, Vellozzi C, Destefano F; Vaccine Safety Datalink. Maternal influenza vaccine and risks for preterm or small for gestational age birth. *J Pediatr* 2014;164:1051-7. e2.
52. Zaman K, Roy E, Arifeen SE, Rahman M, Raqib R, Wilson E, Omer SB, Shahid NS, Breiman RF, Steinhoff MC. Effectiveness of maternal influenza immunization in mothers and infants. *N Engl J Med* 2008;359:1555-64.
53. Kim IS, Seo YB, Hong KW, Noh JY, Choi WS, Song JY, Cho GJ, Oh MJ, Kim HJ, Hong SC, Sohn JW, Cheong HJ, Kim WJ. Perception on influenza vaccination in Korean women of childbearing age. *Clin Exp Vaccine Res* 2012;1:88-94.
54. Kim MJ, Lee SY, Lee KS, Kim A, Son D, Chung MH, Park SG, Park JH, Lee BI, Lee JS. Influenza vaccine coverage rate and related factors on pregnant women. *Infect Chemother* 2009;41:349-54.
55. Lee YK, Kwon Y, Kim DW, Song KM, Cho H, Kim CH, Go UY, Bae GR, Lee JK. 2009-2010 novel influenza A (H1N1) vaccination coverage in the Republic of Korea. *Am J Infect Control* 2012;40:481-3.
56. Noh JY, Kim WJ. Influenza vaccines: unmet needs and recent developments. *Infect Chemother* 2013;45:375-86.
57. Korea Centers for Disease Control and Prevention (KCDC). Korean influenza surveillance report, 2012-2013. Available at: [http://www.cdc.go.kr/CDC/info/CdcKrInfo0301.jsp?menuIds=HOME001-MNU1132-MNU1138-MNU0037-MNU1380&q\\_type=&year=2013&cid=21953&pageNum=](http://www.cdc.go.kr/CDC/info/CdcKrInfo0301.jsp?menuIds=HOME001-MNU1132-MNU1138-MNU0037-MNU1380&q_type=&year=2013&cid=21953&pageNum=). Accessed 15 March 2014.
58. Korea Centers for Disease Control and Prevention (KCDC). Korean influenza surveillance report, 2011-2012. Available at: [http://www.cdc.go.kr/CDC/info/CdcKrInfo0301.jsp?menuIds=HOME001-MNU1132-MNU1138-MNU0037-MNU1380&q\\_type=&year=2012&cid=19407&pageNum=](http://www.cdc.go.kr/CDC/info/CdcKrInfo0301.jsp?menuIds=HOME001-MNU1132-MNU1138-MNU0037-MNU1380&q_type=&year=2012&cid=19407&pageNum=). Accessed 15 March 2014.
59. Korea Centers for Disease Control and Prevention (KCDC). Korean influenza surveillance report, 2010-2011. Available at: [http://www.cdc.go.kr/CDC/info/CdcKrInfo0301.jsp?menuIds=HOME001-MNU1132-MNU1138-MNU0037-MNU1380&q\\_type=&year=2011&cid=12720&pageNum=](http://www.cdc.go.kr/CDC/info/CdcKrInfo0301.jsp?menuIds=HOME001-MNU1132-MNU1138-MNU0037-MNU1380&q_type=&year=2011&cid=12720&pageNum=). Accessed 15 March 2014.
60. Eurosurveillance editorial team. WHO recommendations on the composition of the 2013/14 influenza virus vaccines in the northern hemisphere. *Euro Surveill* 2013;18:pii.20411.
61. Kieninger D, Sheldon E, Lin WY, Yu CJ, Bayas JM, Gabor JJ, Esen M, Fernandez Roure JL, Narejos Perez S, Alvarez Sanchez C, Feng Y, Claeys C, Peeters M, Innis BL, Jain V. Immunogenicity, reactogenicity and safety of an inactivated quadrivalent influenza vaccine candidate versus inactivated trivalent influenza vaccine: a phase III, randomized trial in adults aged  $\geq 18$  years. *BMC Infect Dis* 2013;13:343.
62. Pépin S, Donazzolo Y, Jambrecina A, Salamand C, Saville M. Safety and immunogenicity of a quadrivalent inactivated influenza vaccine in adults. *Vaccine* 2013;31:5572-8.
63. Jain VK, Rivera L, Zaman K, Espos RA Jr, Sirivichayakul C, Quiambao BP, Rivera-Medina DM, Kerdpanich P, Ceyhan M, Dinleyici EC, Cravioto A, Yunus M, Chanthavanich P, Limkittikul K, Kurugol Z, Alhan E, Caplanusi A, Durviaux S, Bou-

- tet P, Ofori-Anyinam O, Chandrasekaran V, Dbaibo G, Innis BL. Vaccine for prevention of mild and moderate-to-severe influenza in children. *N Engl J Med* 2013;369:2481-91.
64. Korea Centers for Disease Control and Prevention (KCDC). Disease web statistics system. Available at: <http://is.cdc.go.kr/nstat/index.jsp>. Accessed 9 December 2014.
65. Kim SA, Kim DW, Dong BQ, Kim JS, Anh DD, Kilgore PE. An expanded age range for meningococcal meningitis: molecular diagnostic evidence from population-based surveillance in Asia. *BMC Infect Dis* 2012;12:310.
66. Cho HK, Lee H, Kang JH, Kim KN, Kim DS, Kim YK, Kim JS, Kim JH, Kim CH, Kim HM, Park SE, Oh SH, Chung EH, Cha SH, Choi YY, Hur JK, Hong YJ, Lee HJ, Kim KH. The causative organisms of bacterial meningitis in Korean children in 1996-2005. *J Korean Med Sci* 2010;25:895-9.
67. Cohn AC, MacNeil JR, Clark TA, Ortega-Sanchez IR, Briere EZ, Meissner HC, Baker CJ, Messonnier NE; Centers for Disease Control and Prevention (CDC). Prevention and control of meningococcal disease: recommendations of the Advisory Committee on Immunization Practices (ACIP). *MMWR Recomm Rep* 2013;62:1-28.
68. Korea Centers for Diseases Control and Prevention (KCDC). Epidemiology and prevention of vaccine-preventable disease. 4th ed. Osong, Korea: KCDC; 2013.
69. Korea Centers for Diseases Control and Prevention (KCDC). National immunization program. Available at: <https://nip.cdc.go.kr/irgd/index.html>. Accessed 9 December 2014.
70. Anonymous. Meeting of the Strategic Advisory Group of Experts on immunization, April 2013 - conclusions and recommendations. *Wkly Epidemiol Rec* 2013;88:201-6.
